# Supplementary material for: Field measurements of biogenic volatile organic compounds in the atmosphere using solid-phase microextraction Arrow
Source: Copernicus journal article supplement (doi:10.5194/amt-2017-329), 2017-10-17
Supplement: Supplementary file [file amt-2017-329-AC1-supplement.pdf]

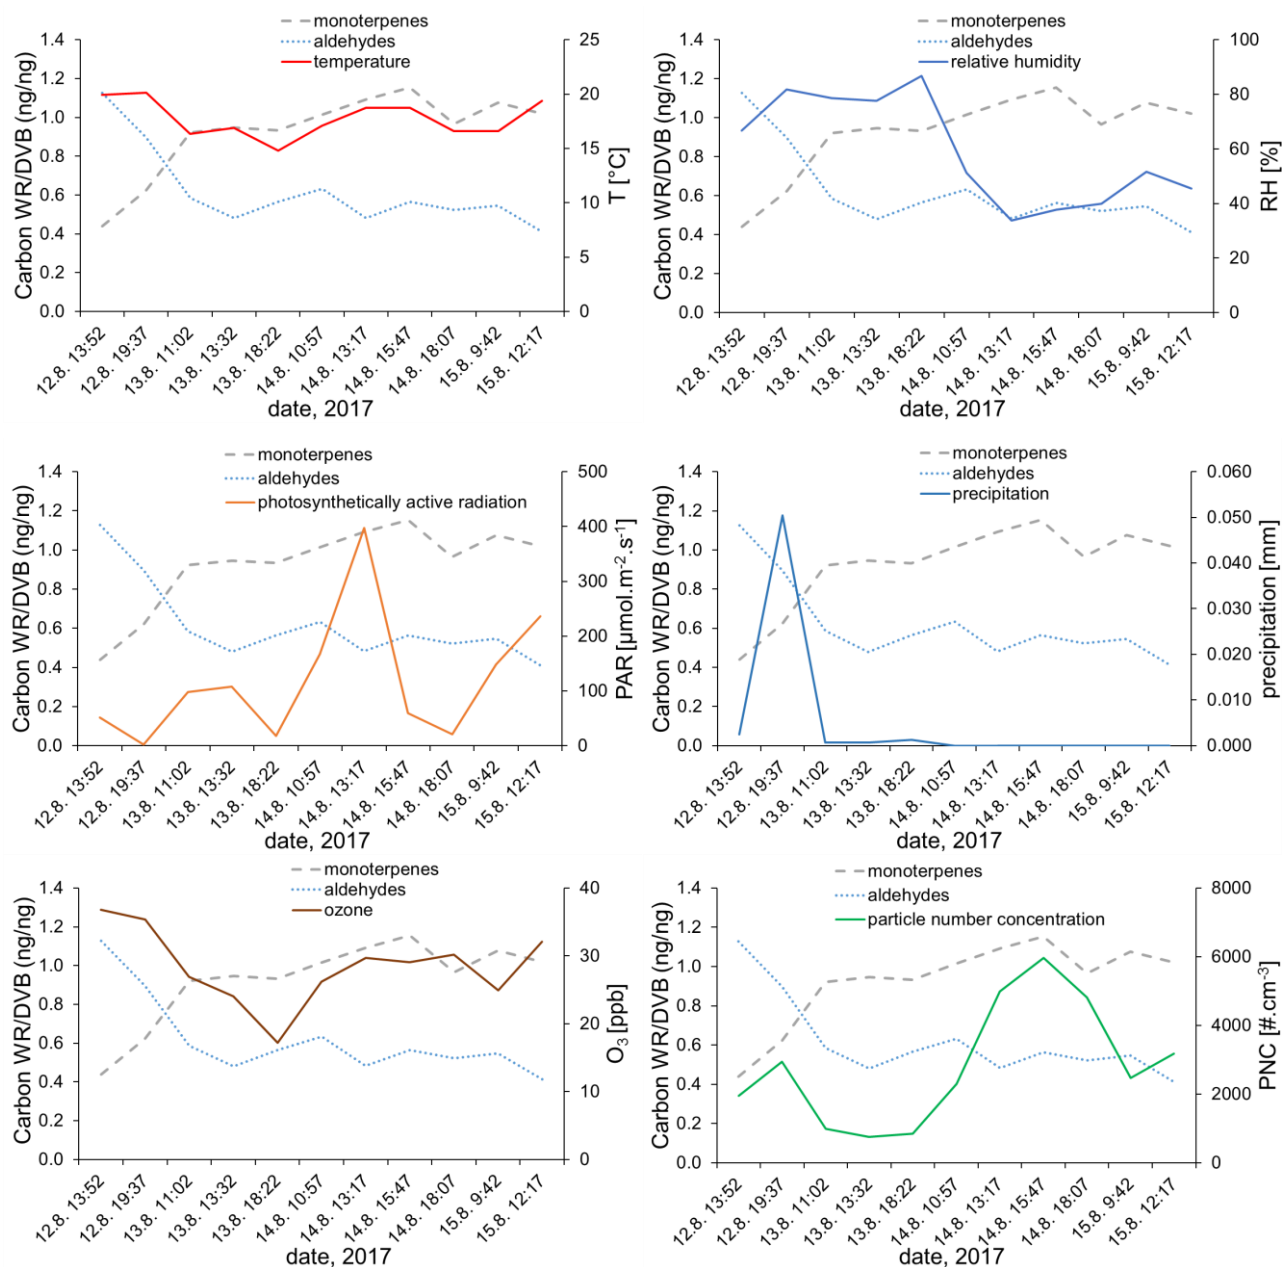

Figure S8: Effect of temperature ( $^{\circ}\text{C}$ ), relative humidity (%), photosynthetically active radiation ( $\mu\text{mol.m}^{-2}.\text{s}^{-1}$ ), precipitation (mm), ozone (ppb) and particle number concentration ( $\#\text{.cm}^{-3}$ ) on the ratio between the amounts of monoterpenes (grey line) and aldehydes (blue line) sampled with PDMS/Carbon WR and PDMS/DVB and measured by GC-MS.
